# Supplementary material for: A co-sol-emulsion-gel synthesis of tunable and uniform hollow carbon nanospheres with interconnected mesoporous shells
Source: Royal Society of Chemistry journal article supplement (doi:10.1039/c5nr06279a), 2015-11-12
Supplement: c5nr06279a1.pdf [file c5nr06279a1.pdf]

## Supporting Information

### **A co-sol-emulsion-gel synthesis of tunable and uniform hollow carbon nanospheres with interconnected mesoporous**

*Jianhua Hou, Tai Cao, Faryal Idrees and Chuanbao Cao,\**

Research Centre of Materials Science, Beijing Institute of Technology, Beijing 100081,  
People's Republic of China.

\*Corresponding Author

E-mail address: cbcao@bit.edu.cn; Tel: +86 10 6891 3792; Fax: +86 10 6891 3792.

**Table S1.** EDX the element composition analysis result of the core and shell for the MHSs-5-90-C/SiO<sub>2</sub>.

| Element | MHSs-5-90-C/SiO <sub>2</sub> (wt.%) |       |       |       |
|---------|-------------------------------------|-------|-------|-------|
|         | a                                   | b     | c     | d     |
| C       | 27.32                               | 26.60 | 28.12 | 26.31 |
| O       | 36.69                               | 35.57 | 35.10 | 37.51 |
| Si      | 35.99                               | 37.83 | 36.78 | 36.18 |

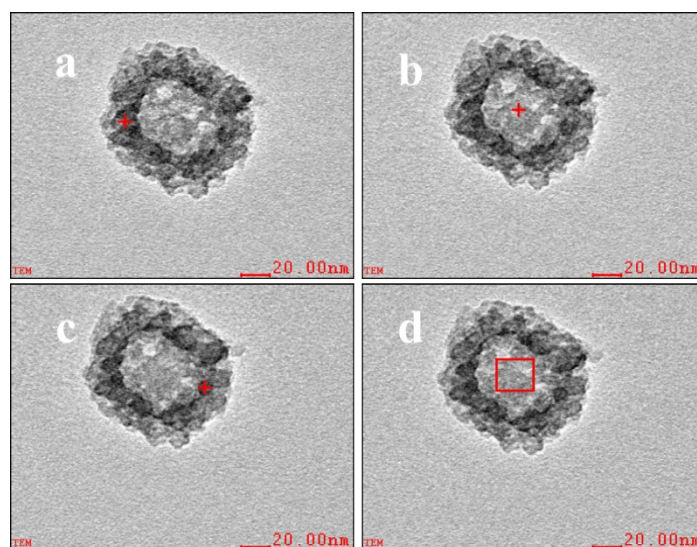

**Figure S1.** EDX elemental analysis of the core and shell of the MHSs-90-C/SiO<sub>2</sub> composites.

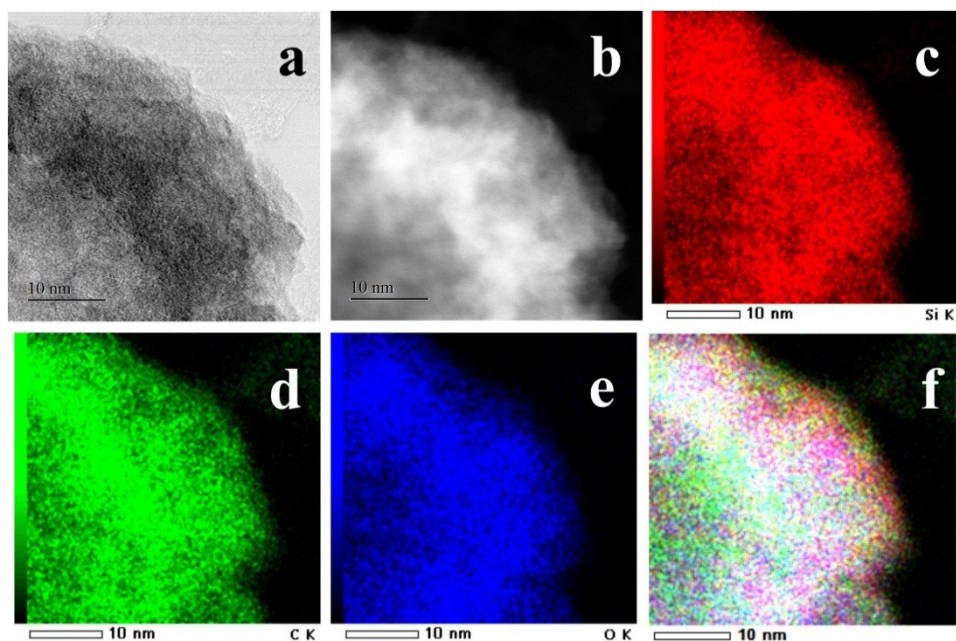

**Figure S2.** BF- and HAADF-STEM magnified images (a, b) of the mesoporous hollow spheres (MHSs-90-C/SiO<sub>2</sub>), (c-e) the corresponding EDX elemental mapping of carbon, silicon, and oxygen, (f) along with an overlay of those three maps.

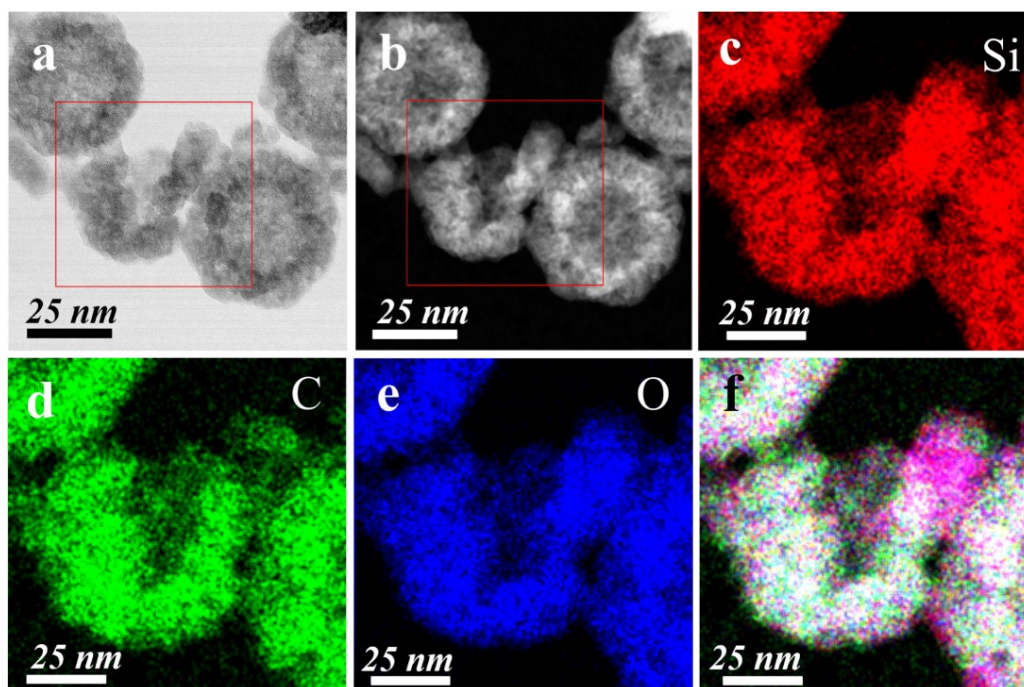

**Figure S3.** BF- and HAADF-STEM images of (a, b) of the wrecked mesoporous hollow sphere (MHSs-90-C/SiO<sub>2</sub>), (c-e) the corresponding EDX elemental mapping of carbon, silicon, and oxygen, (f) along with an overlay of these three maps.

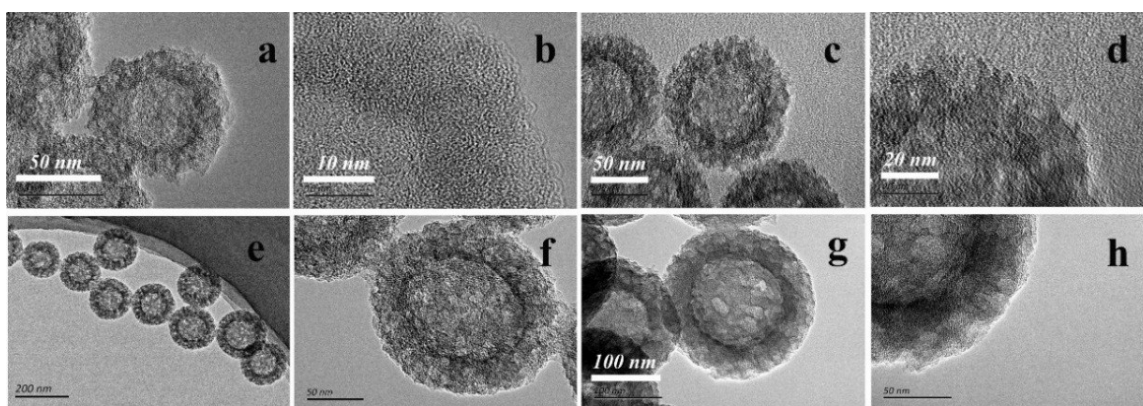

**Figure S4.** HRTEM images of MHCSs-90 (a, b), MHCSs-125(c, d), MHCSs-175 (e, f) and MHCSs-240 (g, h).

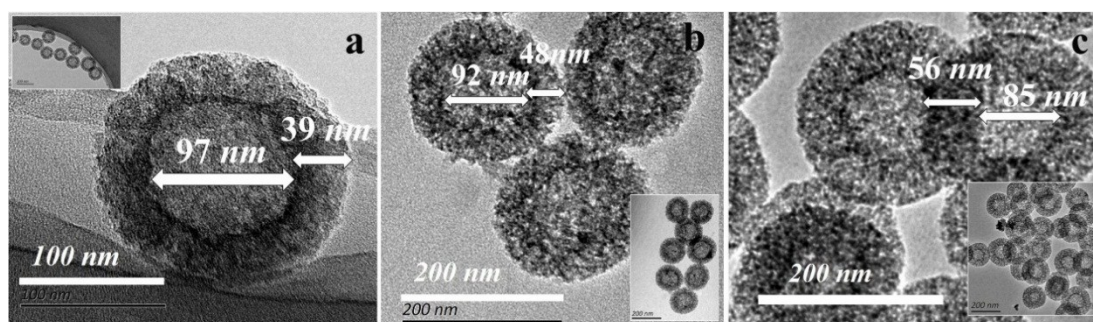

**Figure S5.** TEM images of (a) MHCSs-175, (TEOS-1ml); (b) MHCSs-188 (TEOS-1.5ml) and (c) MHCSs-197 (TEOS-2ml).

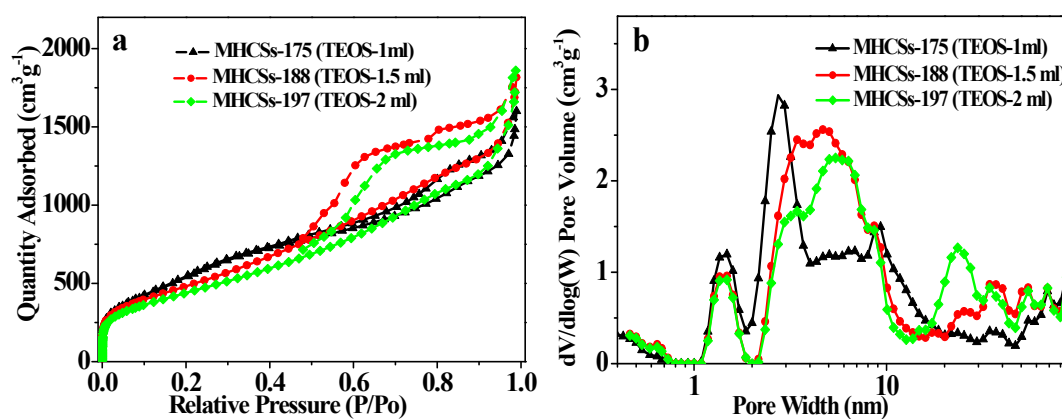

**Figure S6.** (a) Nitrogen adsorption-desorption isotherm; and (b) Pore size distribution of different proportions of TEOS.

**Table S2.** Porosity properties and distribution of pore volume of amount of different proportions of TEOS.

| Sample                 | $S_{\text{BET}}^{[a]}$<br>( $\text{m}^2/\text{g}$ ) | Pore vol and (pore vol%) <sup>[b]</sup> ( $\text{cm}^3/\text{g}$ ) |                     |                     | $D_{\text{aver}}^{[c]}$<br>[nm] |
|------------------------|-----------------------------------------------------|--------------------------------------------------------------------|---------------------|---------------------|---------------------------------|
|                        |                                                     | $V_{\text{total}}$                                                 | $V_{<2 \text{ nm}}$ | $V_{>2 \text{ nm}}$ |                                 |
| MHCSs-175(TEOS-1ml)    | 2203                                                | 1.96                                                               | 0.25(12.8)          | 1.71(78.2)          | 5.32                            |
| MHCSs-188 (TEOS-1.5ml) | 1965                                                | 2.46                                                               | 0.20(8.1)           | 2.26(91.9)          | 5.93                            |
| MHCSs-197 (TEOS-2ml)   | 1858                                                | 2.51                                                               | 0.19(7.6)           | 2.32(92.4)          | 6.53                            |

<sup>[a]</sup>Surface area is calculated with Brunauer–Emmett–Teller (BET) method by using a relative pressure range from 0.05-0.28. <sup>[b]</sup> The volume of pores smaller than 2 nm ( $V_{<2 \text{ nm}}$ ), and pores larger than 2 nm ( $V_{>2 \text{ nm}}$ ) obtained by DFT. <sup>[c]</sup> average pore diameter obtained by BET

**Table S3.** Specific surface area ( $S_{\text{BET}}$ ) and pore volume of typical MHCSs and the other literature.

| Samples                 | $S_{\text{BET}}$ ( $\text{m}^2/\text{g}$ ) | pore volume<br>( $\text{cm}^3/\text{g}$ ) | Ref       |
|-------------------------|--------------------------------------------|-------------------------------------------|-----------|
| MHCSs                   | 2106-2225                                  | 1.95-2.53                                 | This work |
| HGCS                    | 444                                        | 0.36                                      | 5         |
| HCS                     | 603.8                                      | 0.32                                      | 6         |
| OMC                     | 1883                                       |                                           | 7         |
| HCMSC <sub>180/40</sub> | 1314                                       |                                           |           |
| HCMS                    | 1704                                       | 1.6                                       | 11        |
| MCN                     | 857                                        | 0.45                                      | 12        |
| MCN <sub>s</sub>        | 894-1131                                   | 1.11-1.52                                 | 13        |
| HCSs                    | 540 -712                                   | 0.39-0.53                                 | 17        |
| HMCN <sub>s</sub>       | 646                                        | 0.38                                      | 18        |
| HCS <sub>s</sub>        | 367-466                                    | 0.6-1.6                                   | 19        |
| HCSs                    | 690–1370                                   | 0.49–2.33                                 | 20        |
| HCPS                    | 719                                        | 0.44                                      | 22        |
| HCNPs                   | 317.5-431.3                                |                                           | 23        |
| HCS                     | 720                                        |                                           | 24        |
| MHCSs                   | 659- 982                                   | 1.06- 1.69                                | 25        |
| MHCSs                   | 629-1321                                   | 0.66-1.05                                 | 28        |

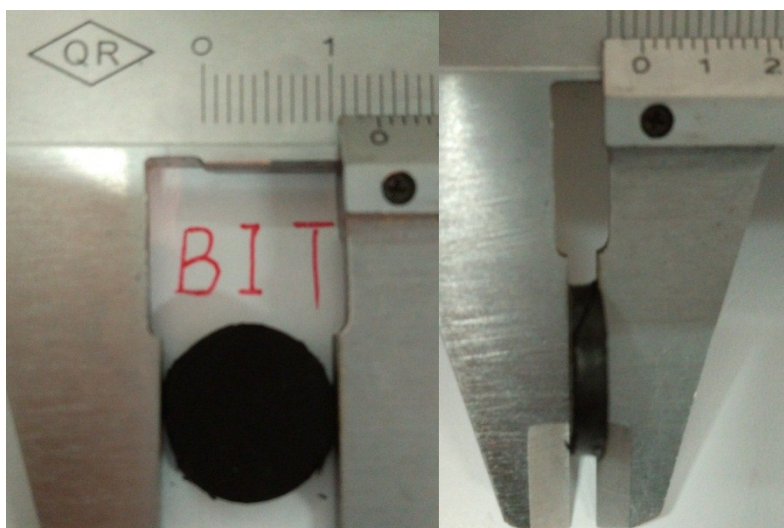

**Figure S7.** Radius and height of MHCSs electrode material (Formula S1 is used to calculate density of MHCSs electrode).

$$\rho = \frac{m}{v} = \frac{m}{s \cdot h} = \frac{m}{\pi r^2 \cdot h} \quad (\text{S1})$$

By using S1 formula density of MHCSs electrode material calculated is 0.37-0.43 g cm<sup>-3</sup>, the details of it are summarized in Table S3.

**Table S4.** The tap density of the electrode's material, thickness and weight of typical MHCSs

| Samples   | Tap density of the electrode's material (g/cm <sup>3</sup> ) | electrode's thickness (cm) | electrode's diameter (cm) | electrode's weight (mg) |
|-----------|--------------------------------------------------------------|----------------------------|---------------------------|-------------------------|
| MHCSs-90  | 0.42                                                         | 0.022-0.028                | 1.1                       | 8.8-11.4                |
| MHCSs-125 | 0.41                                                         | 0.022-0.028                | 1.1                       | 8.6-11.2                |
| MHCSs-175 | 0.39                                                         | 0.022-0.028                | 1.1                       | 8.2-10.4                |
| MHCSs-240 | 0.37                                                         | 0.022-0.028                | 1.1                       | 7.7-9.8                 |

**Table S5.** Combustion elemental analysis and XPS result of HMCSs-90

| HMCSs-90           | C wt% | N wt% | O wt% | F wt% | Si wt% | H wt% |
|--------------------|-------|-------|-------|-------|--------|-------|
| XPS                | 94.07 | 1.28  | 3.97  | 0.05  | 0.63   | -     |
| Elemental analysis | 93.43 | 1.21  | 4.64  | -     | -      | 0.72  |

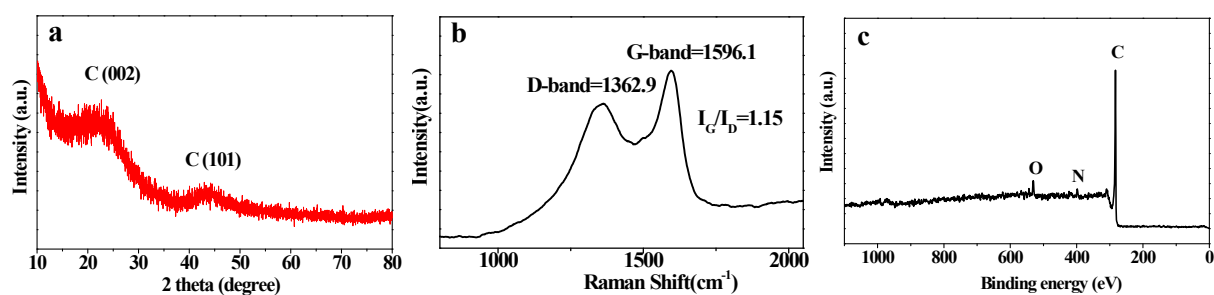**Figure S8.** (a) XRD pattern, (b) Raman spectrum and (c) XPS spectra of MHCSs-90.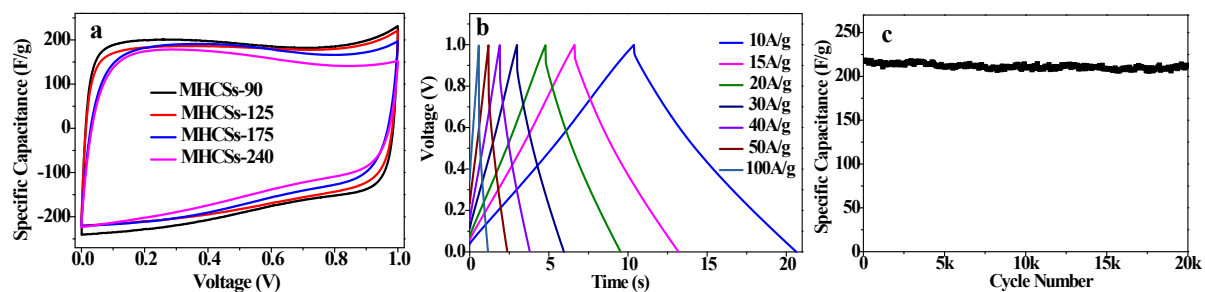**Figure S9.** Electrochemical performance characteristics measured for MHCSs in a two-electrode system in 6 M KOH electrolyte. (a) Cyclic voltammograms at 0.1 V/s of MHCSs. (b) Galvanostatic charge-discharge curves of MHCSs-90 at different current densities. (c) Cycling stability of MHCSs-90 test at 5 A/g.

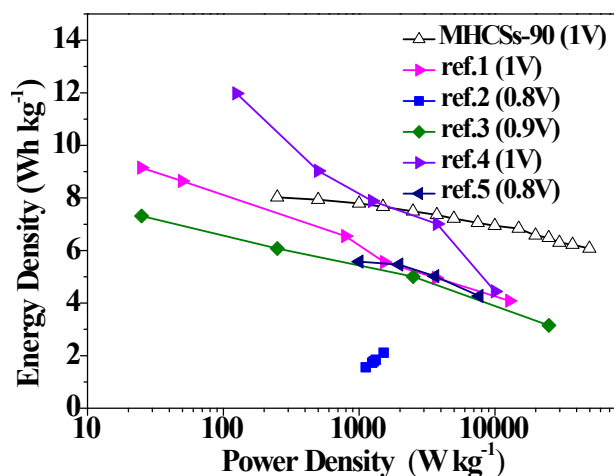

**Figure S9.** Ragone plot of advanced porous carbon materials that can be found in the literature with outstanding behavior as supercapacitor electrodes in  $\text{H}_2\text{SO}_4$  or  $\text{KOH}$  electrolyte.

- 1 Y. S. Yun, S. Y. Cho, J. Shim, B. H. Kim, S. J. Chang, S. J. Baek, Y. S. Huh, Y. Tak, Y. W. Park, S. Park, H. J. Jin, *Adv. Mater.*, 2013, **25**, 1993-1998.
- 2 Z. A. Qiao, B. Guo, A. J. Binder, J. Chen, G. M. Veith, S. Dai, *Nano Lett.*, 2013, **13**, 207-212.
- 3 K. Xie, X. Qin, X. Wang, Y. Wang, H. Tao, Q. Wu, L. Yang, Z. Hu, *Adv. Mater.*, 2012, **24**, 347-352.
- 4 W. Qian, F. Sun, Y. Xu, L. Qiu, C. Liu, S. Wang, F. Yan, *Energy Environ. Sci.*, 2014, **7**, 379-386.
- 5 B. You, J. Yang, Y. Sun, Q. Su, *Chem. Commun.*, 2011, **47**, 12364-12366.
